1 **Title: Tamoxifen repurposing to combat infections by multidrug-resistant Gram-negative**  
2 **bacilli**

3  
4 **Authors:** Andrea. Miró-Canturri<sup>1,2†</sup>, Rafael. Ayerbe-Algaba<sup>1,2†</sup>, Raquel. del Toro<sup>2,3,5</sup>, Jerónimo.  
5 Pachón<sup>2,4</sup>, Younes. Smani<sup>1,2\*</sup>.

6  
7 **Affiliations:** <sup>1</sup>Clinical Unit of Infectious Diseases, Microbiology and Preventive Medicine,  
8 University Hospital Virgen del Rocío, Seville, Spain. <sup>2</sup>Institute of Biomedicine of Seville (IBiS),  
9 University Hospital Virgen del Rocío/CSIC/University of Seville, Seville, Spain. <sup>3</sup>Department of  
10 Medical Physiology and Biophysics, Institute of Biomedicine of Seville, University of Seville,  
11 Sevilla, Spain. <sup>4</sup>Department of Medicine, University of Seville, Seville, Spain. <sup>5</sup>CIBER de  
12 enfermedades cardiovasculares (CIBER-CV), Spain.

13  
14 \*To whom correspondence should be addressed: Younes Smani, Clinic Unit of Infectious  
15 Diseases, Microbiology and Preventive Medicine, Institute of Biomedicine of Seville (IBiS),  
16 University Hospital Virgen del Rocío, Av. Manuel Siurot s/n, 41013, Seville, Spain. Tel: +34-  
17 955923100, E-mail: ysmani-ibis@us.es.

18 †Both authors have contributed equally to this work.

19  
20 **Running title:** Tamoxifen and its metabolites antibacterial activities.

21

22 **Abstract**

23 The development of new strategic therapies for multidrug-resistant bacteria, like the use of non-  
24 antimicrobial approaches and/or drugs repurposing to be used as monotherapies or in  
25 combination with clinically relevant antibiotics, has become an urgent need. A therapeutic  
26 alternative for infections by multidrug-resistant Gram-negative bacilli (MDR-GNB) is immune  
27 system modulation to improve the infection clearance. We showed that immunocompetent mice  
28 infected by *Acinetobacter baumannii*, *Pseudomonas aeruginosa* or *Escherichia coli* in peritoneal  
29 sepsis models and treated with tamoxifen at 80 mg/kg/d for three days reduced the release of  
30 MCP-1 and its signalling pathway IL-18 and phosphorylated ERK1/2. This reduction of MCP-1  
31 induced the reduction of migration of inflammatory monocytes and neutrophils from bone  
32 marrow to blood. Indeed, the treatment with tamoxifen in murine peritoneal sepsis models  
33 reduced the bacterial load in tissues and blood; and increased the mice survival from 0% to 60-  
34 100%. Tamoxifen treatment of neutropenic mice infected by these pathogens increased mice  
35 survival up to 20-60%. Furthermore, susceptibility and time-kill assays showed that the  
36 metabolites of tamoxifen, N-desmethyltamoxifen, hydroxytamoxifen and endoxifen, the three  
37 together exhibited MIC<sub>90</sub> values of 16 mg/L and were bactericidal against clinical isolates of *A.*  
38 *baumannii* and *E. coli*. This antimicrobial activity of tamoxifen metabolites parallels' an  
39 increased membrane permeability of *A. baumannii* and *E. coli* without affecting their outer  
40 membrane proteins profiles. Together, these data showed that tamoxifen present a therapeutic  
41 efficacy against MDR *A. baumannii*, *P. aeruginosa* and *E. coli* in experimental models of  
42 infections and can be repurposed as new treatment for GNB infections.

43

44

45 **Importance**

46 Antimicrobial resistance in Gram-negative bacilli (GNB) is a global health treat. Drug  
47 repurposing, a novel approach involving the search of new indications for FDA approved drugs  
48 is gaining interest. Among them, we found the anti-cancer drug tamoxifen, which presents very  
49 promising therapeutic efficacy. The current study showed that tamoxifen presents activity in  
50 animal models of infection with MDR *Acinetobacter baumannii*, *Pseudomonas aeruginosa* and  
51 *Escherichia coli* by modulating the traffic of innate immune system cells and the antibacterial  
52 activity presented by its three major metabolites produced *in vivo* against these GNB. Our results  
53 offer a new candidate to be repurposed to treat severe infections caused by these pathogens.

54

## 55 **Introduction**

56 Infections caused by Gram-negative bacilli (GNB) such as *Acinetobacter baumannii*,  
57 *Pseudomonas aeruginosa* and *Escherichia coli* represent an increasing worldwide problem. In  
58 2017, the World Health Organization has listed these pathogens as the first antibiotic-resistant  
59 “priority pathogens” that pose the greatest threat to human health. There is, therefore, an urgent  
60 need to find new antimicrobial agents against extensive- and pan-drug-resistant GNB. Two key  
61 approaches can help alleviate the problem of antibiotic resistance, firstly targeting of bacterial  
62 virulence factors without inhibiting bacterial growth, which can slow the development of drug  
63 resistance by reducing the selective pressure on the bacteria (1, 2) and, secondly, by the  
64 modulation/regulation of the immune system response to improve the infection development (3,  
65 4). In this way, some studies were focused on the stimulation of the immune system to treat  
66 bacterial infections using molecules, including lysophosphatidylcholine as monotherapy and as  
67 adjuvant for the antimicrobial treatment (3, 5, 6) or 3'-5'-cyclic diguanylic acid (c-di-GMP)  
68 which increase neutrophils protecting against *A. baumannii* infection (7).

69 Inflammatory monocytes and neutrophils derived from bone marrow are important cellular  
70 mediators of innate immune response against bacterial infections. During early stages of  
71 bacterial infection, both cell populations migrate from the bone marrow to the bloodstream and  
72 subsequently to the sites of infection (8, 9). This migration is regulated partially by the monocyte  
73 chemotactic protein-1 (MCP-1), which expression is increased by bone marrow mesenchymal  
74 cells in response to circulating Toll-like receptor ligands and produces the mobilization of  
75 inflammatory monocytes (10). It is well established that MCP-1 release is controlled by IL-18  
76 and ERK1/2 (11), and the levels of MCP-1 are higher in patients with sepsis and septic shock,  
77 and pneumonia (12, 13).

78 It is well documented that anti-cancer drugs like tamoxifen can modify the immune response by  
79 regulating cytokine release (14). Mechanistically, tamoxifen has been reported to reduce MCP-1  
80 transcription and expression in human coronary artery endothelial cells and endometrial cancer  
81 cells, respectively (15, 16). As MCP-1 is involved in the immune cells migration, it may be  
82 hypothesized that an undiscovered connection between MCP-1 release and immune cells  
83 migration after bacterial infection and treatment with tamoxifen is present.

84 In prokaryotic cells, tamoxifen is known to present antifungal and antibacterial activities against  
85 *Mycobacterium tuberculosis* and some Gram-positive bacteria *in vitro* and *in vivo* (17, 18), but  
86 not against Gram-negative bacteria. As with other antimicrobial agent such as colistimethate  
87 sodium (19), tamoxifen is a prodrug and converted after liver passage to three major active  
88 metabolites, 4-hydroxytamoxifen, endoxifen and N-desmethyltamoxifen (20). However, their  
89 antibacterial activities remain unknown.

90 In this study, we report that tamoxifen downregulates the expression of MCP-1, impairing the  
91 migration of bone marrow derived cells to the bloodstream induced by *A. baumannii*, *P.*  
92 *aeruginosa* and *E. coli* and, consequently, modulating the inflammatory response. In murine  
93 peritoneal sepsis model, we observe that tamoxifen decreases the development of infection by  
94 these pathogens, lowering their concentrations in tissues and blood and increasing the mice  
95 survival. Although tamoxifen did not present bactericidal nor bacteriostatic effects against *A.*  
96 *baumannii*, *P. aeruginosa* and *E. coli in vitro*, we show that tamoxifen metabolites exhibit high  
97 antibacterial activity against *A. baumannii* and *E. coli*, suggesting that tamoxifen metabolism is  
98 actively involved in the therapeutic efficacy of tamoxifen *in vivo*.

99

## 100 **Results**

101 ***Bone marrow immune cells migrates in response to MCP-1 and IL-18 during bacterial***  
102 ***infection***

103 To determine whether bacterial infection influences circulating immune cells from the bone  
104 marrow in response to MCP-1 and IL-18, a MCP-1 controller (11), we administered  
105 intraperitoneally *A. baumannii*, *P. aeruginosa* and *E. coli* to mice and measured the proportions  
106 of myeloid cells CD11b+, inflammatory monocytes CD11b+Ly6C<sup>hi</sup> and neutrophils  
107 CD11b+Ly6G+. *A. baumannii* administration decreased, 24 h after, the myeloid cells,  
108 inflammatory monocytes and neutrophils in bone marrow, and increased them in blood (Figures  
109 1A, 1B and 1C). Same results were observed when mice were infected with *P. aeruginosa* and *E.*  
110 *coli* (Figures 1A, 1B and 1C). The rates of these immune cells in the spleen remained unchanged  
111 after infection with *A. baumannii*, *P. aeruginosa* and *E. coli* for 24 h (Figure S1) indicating that  
112 the increase of circulating monocytes and neutrophils did not proceed from the splenic reservoir  
113 (21, 22).

114 A paradigm widely accepted is the formation of chemokine gradients to guide inflammatory cells  
115 to the sites of infection (23). Among them, MCP-1 has been shown to be involved in the  
116 migration of immune cells from the bone marrow to the bloodstream after binding to CCR2  
117 receptor (24). As it is shown in the figure 1D, mice infected with *A. baumannii*, *P. aeruginosa*  
118 and *E. coli* for 6 and 24 h increased significantly and progressively the release of MCP-1 in mice  
119 serum (between  $\approx 1000$  and  $4000 \mu\text{g/mL}$ ). It is well known that MCP-1 release is controlled by  
120 IL-18 and ERK1/2 (11). Consequently, the levels of IL-18 in mice serum gradually increased 6  
121 and 24 h after infection by *A. baumannii*, *P. aeruginosa* and *E. coli*. The IL-18 levels at 24 h were  
122  $2144 \pm 408.1 \mu\text{g/mL}$ ,  $7286 \pm 1056 \mu\text{g/mL}$  and  $3124 \pm 671.3 \mu\text{g/mL}$ , respectively (Figure 1E).  
123 Moreover, ERK1/2 was phosphorylated 2 h after infection of RAW 264.7 macrophages cell line

124 *in vitro* by *A. baumannii*, *P. aeruginosa* and *E. coli*, defining the activation of kinase response to  
125 these pathogens (Figure 1F).

126 To determine whether MCP-1 is involved in the migration of inflammatory monocytes and  
127 neutrophils from bone marrow to blood, wild-type (WT) and mice lacking MCP-1 protein (MCP-  
128 1 KO mice) were infected by *A. baumannii*, *P. aeruginosa* and *E. coli*. First, we detected MCP-1  
129 release only in WT mice (Figure 2A). Importantly, the infection of MCP-1 KO mice by these  
130 pathogens showed that the migration of inflammatory monocytes and neutrophils from bone  
131 marrow to blood (Figures 2B and 2C) exhibits a reduction of  $2.17 \pm 1.14\%$  and  $4.13 \pm 0.99\%$ ,  
132 respectively, for *A. baumannii* infection. Similar results were observed when MCP-1 KO mice  
133 were infected with *P. aeruginosa* and *E. coli* strains (Figures 2B and 2C).

134 Non-infected WT and MCP-1 KO mice presented similar inflammatory monocytes and  
135 neutrophil proportions in bone marrow and blood indicating that the lack of MCP-1 did not  
136 affect the migration of these cells from bone marrow in basal conditions (Figures 2B and 2C).  
137 These data suggest that MCP-1 is involved in the traffic of immune cells from the bone marrow  
138 to blood after infection by *A. baumannii*, *P. aeruginosa* and *E. coli*.

139

#### 140 ***Tamoxifen impairs the migration of immune cells from bone marrow to blood through MCP-1*** 141 ***regulation***

142 In order to study whether tamoxifen can modulate inflammation generated by bacterial  
143 infections, we treated RAW 264.7 macrophage cell line with tamoxifen during 24 h and infected  
144 them with *A. baumannii*, *P. aeruginosa* or *E. coli* for 2 h. After this incubation we determined  
145 the secretion of MCP-1 in the macrophage cells supernatant (ELISA assay) and the  
146 phosphorylation of ERK in the macrophage cells by Western blot. The treatment with tamoxifen

147 decreased the release of MCP-1 and the phosphorylation of ERK1/2 in macrophages infected by  
148 these pathogens, compared to macrophages without tamoxifen treatment (Figures 3A and 3B).  
149 To confirm these data *in vivo*, mice were treated ip. with 3 doses of 80 mg/kg/d of tamoxifen  
150 before the bacterial infection. Serum was collected 6 and 24 h post-bacterial infection. Figure 3C  
151 revealed that treatment with tamoxifen reduced MCP-1 levels when compared with *A.*  
152 *baumannii*, *P. aeruginosa* or *E. coli* infected and not treated groups. It is noteworthy to highlight  
153 that IL-18 levels were also reduced after tamoxifen treatment of infected mice by *A. baumannii*,  
154 *P. aeruginosa* and *E. coli* (Figure 3D). These results suggest that the reduction of IL-18 secretion  
155 due to tamoxifen injection may drive a reduction of MCP-1 release through a reduction of ERK  
156 phosphorylation. This MCP-1 reduction after tamoxifen injection could produce less migration  
157 of monocytes and neutrophils from the bone marrow to the blood.

158 In order to confirm whether tamoxifen treatment reduces the proportions of myeloid cells,  
159 inflammatory monocytes and neutrophils in bone marrow and blood, we administer tamoxifen in  
160 mice before infection by *A. baumannii*, *P. aeruginosa* and *E. coli* for 24 h. Flow cytometric  
161 analysis demonstrated that treatment with tamoxifen reduced the migration of these cells to the  
162 blood and the levels in bone marrow were maintained compared with the levels of infected group  
163 (Figures 4A, 4B and 4C).

164 MCP-1 KO mice showed an impaired migration of inflammatory monocytes and neutrophils  
165 from bone marrow to blood after bacterial infection (Figures 2B and 2C). In order to determine  
166 whether tamoxifen is able to reduce this migration in mice deficient in MCP-1 secretion, we  
167 treated MCP-1 KO mice with tamoxifen and infected them with *A. baumannii*, *P. aeruginosa*  
168 and *E. coli*. As it is shown in the figures 5A and 5B, tamoxifen treated mice presented a  
169 reduction in the migration of inflammatory monocytes and neutrophils, despite of the lack of



170 MCP-1. Both populations were more present in bone marrow and the frequencies in the blood  
171 were also reduced when compared with WT mice treated with tamoxifen and infected by these  
172 pathogens, indicating that tamoxifen may probably regulate other chemokines and migration  
173 pathways involved in this phenomenon (Figure S2, Figure 5).

174

### 175 ***Tamoxifen enhances bacterial killing of macrophages and neutrophils in-vitro***

176 Recent studies reported that treatment with tamoxifen enhances neutrophil activity by increasing  
177 the NETosis and induces changes in macrophages by inhibiting the expression of CD36 and  
178 PPAR $\gamma$  reducing atherosclerosis (25, 26), but there are no data regarding the immune function of  
179 both cells treated with tamoxifen after a bacterial infection. To determine whether tamoxifen can  
180 increase the killing activity of macrophages and neutrophils, assays with RAW 246.7 cell line  
181 and HL-60 neutrophils cell line pretreated with tamoxifen and infected by *A. baumannii*, *P.*  
182 *aeruginosa* and *E. coli* were performed. We demonstrated that macrophages incubation with  
183 tamoxifen (2.5 mg/L) at 2 and 6 h followed by infection with *A. baumannii* during 2 h decreased  
184 the bacterial internalization by 10 and 30%, respectively (Figure S3A), without affecting the  
185 amount of *A. baumannii* in the extracellular medium (Figure S3B). Similar results were observed  
186 after treatment with tamoxifen and infection by *E. coli*, but not by *P. aeruginosa* (Figure S3A).  
187 Regarding neutrophil activity, incubation with 2.5 mg/L of tamoxifen during 2 and 6 h followed  
188 by the infection with *A. baumannii* during 2 h increased bacterial killing by 5 and 25%,  
189 respectively. Similar results were observed after treatment with tamoxifen and infection by *E.*  
190 *coli*, but not by *P. aeruginosa* (Figure S3A).

191 Accordingly, tamoxifen treatment increases the killing activity of macrophages and neutrophils  
192 against *A. baumannii* and *E. coli* but not against *P. aeruginosa*.

193

194 ***Tamoxifen increase mice survival and decrease the bacterial burden in a murine sepsis model***

195 ***by A. baumannii, P. aeruginosa and E. coli***

196 Our results demonstrated that tamoxifen plays an important role in innate immune cells  
197 trafficking after bacterial infection. Going further we wanted to know whether tamoxifen could  
198 protect the mice against a lethal bacterial inoculum. We treated mice with tamoxifen (80  
199 mg/kg/d) administered intraperitoneally three days before the infection with a minimal lethal  
200 dose 100 (MLD100) of *A. baumannii*, *P. aeruginosa* and *E. coli*. Pretreatment with tamoxifen  
201 increased mice survival after infection by *A. baumannii*, *P. aeruginosa* and *E. coli* to 100, 66.7  
202 and 83.3% ( $P<0.01$ ), respectively (Figure 6A). Figure 6B shows that treatment with tamoxifen  
203 decreased spleen and lung bacterial concentrations of these pathogens by 6.64 and 7.17 log<sub>10</sub>  
204 CFU/g ( $P<0.015$ ; for *A. baumannii*), by 3.58 and 5.1 log<sub>10</sub> CFU/g ( $P<0.015$ ; for *P. aeruginosa*),  
205 and by 3.7 and 4.16 log<sub>10</sub> CFU/g ( $P<0.015$ ; for *E. coli*), compared with the control infected  
206 groups. Blood bacterial concentrations presented a decrease compared to control infected groups  
207 of 5.53, 5.45 and 4.31 log<sub>10</sub> CFU/mL ( $P<0.01$ ) for *A. baumannii*, *P. aeruginosa* and *E. coli*,  
208 respectively. Similar efficacy of tamoxifen was observed in murine peritoneal sepsis model by  
209 susceptible and MDR clinical isolates of *A. baumannii*, *P. aeruginosa* and *E. coli*. Treatment  
210 with tamoxifen increased the mice survival to 66.7, 83.3 and 50% ( $P<0.01$ ) for the non-MDR *A.*  
211 *baumannii*, *P. aeruginosa* and *E. coli*, respectively, and 83.3, 66.7 and 50% ( $P<0.01$ ) for the  
212 MDR *A. baumannii*, *P. aeruginosa* and *E. coli* harboring *mcr-1* gene (Figure 6C). These findings  
213 indicate that tamoxifen treatment presents a good therapeutic efficacy against reference and  
214 clinical isolates of *A. baumannii*, *P. aeruginosa* and *E. coli*.

215

216 ***Immunosuppressed mice respond to tamoxifen treatment***

217 Previous studies have demonstrated that infection with *A. baumannii*, *P. aeruginosa* and *E. coli*  
218 in immunosuppressed mice is lethal (27-29). To determine whether tamoxifen treatment is still  
219 therapeutically effective in immunosuppressed mice, we treated immunocompetent mice with  
220 cyclophosphamide to reduce the circulating monocytes and neutrophils (Figure S4). After *A.*  
221 *baumannii* and *E. coli* infection in these immunosuppressed mice, tamoxifen treatment increase  
222 mice survival in both groups to 66.67 % (Figure 7A); however, with *P. aeruginosa* the survival  
223 was only 16.67% (Figure 7A). Bacterial loads of *A. baumannii* and *E. coli* in spleen, lung and  
224 blood were reduced in immunosuppressed mice after treatment with tamoxifen, likewise in  
225 immunocompetent mice. In contrast, bacterial loads of *P. aeruginosa* in tissues and blood were  
226 not reduced in immunosuppressed mice after treatment with tamoxifen (Figure 7B). These  
227 findings suggest that tamoxifen help to clear the infection by *A. baumannii* and *E. coli* even  
228 though mice were immunosuppressed by an additional independent immune response  
229 mechanism.

230

231 ***Tamoxifen metabolites present antibacterial activity targeting the bacterial membrane***

232 Despite the fact that tamoxifen has no bactericidal activity *in vitro* (MIC > 256 mg/L), we  
233 reasoned that the *in vivo* antimicrobial activity of tamoxifen observed in neutropenic mice should  
234 result from tamoxifen metabolism in mice organism. Susceptibility assays showed that these  
235 tamoxifen metabolites together exhibit MIC<sub>50</sub> values of 8 and 16 mg/L against 100 and 47  
236 clinical isolates of *A. baumannii* and *E. coli*, respectively (Figure 8A). These data were  
237 confirmed by time-kill assays showing that tamoxifen metabolites had excellent bactericidal  
238 activity against MDR *A. baumannii* and *E. coli* strains during 8 h of growth (Figure 8B).

239 In order to determine the mode of action of tamoxifen metabolites, we examined their effect on  
240 the membrane permeability. Tamoxifen metabolites strongly increased the membrane  
241 permeability time-dependent (Figure 8C), without affecting the outer membrane proteins  
242 (OMPs) profile (Figure 8D). This suggests that tamoxifen metabolites affect only the integrity of  
243 the bacterial cell wall without changing the expression of the OMPs. Determining the specific  
244 mechanism of action of tamoxifen metabolites requires further investigation.

245

## 246 **Discussion**

247 The present study provides new data highlighting the antibacterial effect of tamoxifen and its  
248 metabolites. Here, we provide the first evidence of an essential role played by tamoxifen in the  
249 regulation of immune cells traffic after bacterial infection, in order to reduce the  
250 hyperinflammation caused by sepsis, and its antibacterial activity *in vivo* through the generation  
251 of active metabolites presenting bactericidal activity against GNB.

252 This study, as well as previous works (8, 9), showed that the regulation of inflammatory  
253 monocytes and neutrophils migration are important in the host defense against bacterial  
254 infections. This is consistent with the immune system modulation that improves the bacterial  
255 infection clearance (4). Exploiting immunomodulatory drugs, approved by the regulatory  
256 agencies for clinical indication different to bacterial infection therapy, has several advantages  
257 (30); thus, information of their pharmacological characteristics (toxicity and pharmacokinetics)  
258 in preclinical and clinical trials is available. Therefore, the time and the economic costs of the  
259 evaluation of these drugs in other therapeutic applications, such as the treatment of bacterial  
260 infections, will be reduced (31). Among these immunomodulatory drugs, we found tamoxifen as  
261 a promising therapeutic candidate; which has showed antifungal and antibacterial activities

262 against *Mycobacterium tuberculosis* and some Gram-positive bacteria *in vitro* and *in vivo* (17,  
263 18, 25).

264 Here, we showed that tamoxifen reduces the release of MCP-1 and IL-18, and the  
265 phosphorylation of ERK, which contributes to efficient reduction of migration of inflammatory  
266 monocytes and neutrophils from bone marrow to blood. Recruitment of both immune cells from  
267 bone marrow to blood during systemic infection with GNB is probably mediated by multiple  
268 pathways dependent or independent to MCP-1 such as MyD88 and MIP-2 (32-34). MyD88 has  
269 been reported to induce MCP-1 release of macrophages after their infection by *Listeria*  
270 *monocytogenes* (32). In contrast, to our knowledge, MIP-2 is not involved in the release of MCP-  
271 1 by eukaryotic cells. The presence of pathways independent to MCP-1 has been confirmed in this  
272 study in MCP-1 KO mice infected by *A. baumannii*, *P. aeruginosa* and *E. coli*, which  
273 inflammatory monocytes and neutrophils still migrate at lower levels from bone marrow to  
274 bloodstream. Previous independent work reported that deletion of MCP-1 in mice did not  
275 abolish completely the recruitment of monocytes during the infection by *L. monocytogenes*  
276 and this recruitment was diminished by 40-50% (35), suggesting the involvement of MCP-3,  
277 another monocyte chemoattractant protein, after binding to CCR2 receptor in the systemic  
278 bacterial infection (36). Regarding neutrophils, although it is widely accepted that MIP-2  
279 stimulates their migration from bone marrow (37, 38), we demonstrated for the first time that in  
280 MCP-1 KO mice the migration of neutrophils from bone marrow to bloodstream after GNB  
281 infection was diminished, suggesting the involvement of MCP-1 in this process. This result is  
282 consistent with previous observation that MCP-1 regulates the recruitment of neutrophils to the  
283 lung after *E. coli* infection (34). Based on these data, MCP-1 plays an important role in the  
284 migration of inflammatory monocytes and neutrophils from bone marrow to bloodstream.

285 However, this migration in MCP-1 KO mice infected by GNB and treated with tamoxifen is  
286 reduced but not abolished. A possible explanation could be the involvement of other MCP-1-  
287 independent pathways regulated by tamoxifen. In this context, further studies are required to  
288 decipher the role of these MCP-1-independent pathways in this process.

289 A consequence of the reduction in monocyte proportions in blood after treatment with tamoxifen  
290 would be the reduction of macrophages and dendritic cells in blood and tissues. Although the  
291 number of macrophages and neutrophils recruited to the sites of infection in mice treated with  
292 tamoxifen would be lower, our *in-vitro* assays suggested that their killing activity against *A.*  
293 *baumannii* and *E. coli* was enhanced by tamoxifen. The inflammatory monocytes are the  
294 precursors of a subset of dendritic cells (TipDC), which produce tumor necrosis factor- $\alpha$  (TNF-  
295  $\alpha$ ) and inducible oxide synthase (iNOS) contributing to the innate defense against *L.*  
296 *monocytogenes* infection (39, 40). In contrast, other study reported that the reduction of  
297 proinflammatory monocytes and TipDC during *Trypanosoma brucei* infection diminished their  
298 pathogenicity (41). These contradictory results in the effect of monocytes and TipDC recruitment  
299 on host survival could be explained by the difference in cellular location of each pathogen, *L.*  
300 *monocytogenes* is intracellular whereas *T. brucei* remains in plasma (9). Moreover, it is reported  
301 that tamoxifen inhibits *in vitro* the maturation of TipDC, in presence of 17  $\beta$ -estradiol, which not  
302 respond enough to bacterial LPS (42). We suggest that the reduction in the dendritic cells'  
303 proportions joined with their less maturation after tamoxifen treatment produced a reduction in  
304 TNF- $\alpha$  and iNOS production, minimizing their deleterious effects in sepsis situation. In our  
305 study, we found that mice treatment with tamoxifen reduce the release of proinflammatory  
306 cytokines such as TNF- $\alpha$  and IL-6 (data not shown). Accordingly, although we previously  
307 pointed that *A. baumannii* could support intracellular lifestyle (43, 44), bacterial species used in

308 our study are viewed as extracellular pathogens and are present in blood. Consequently, it is  
309 possible that in our model of study, reduction of monocyte and TipDC frequencies by tamoxifen  
310 treatment, and the reduction of proinflammatory cytokines release may play an important role in  
311 the therapeutic efficacy of tamoxifen.

312 It is noteworthy that tamoxifen therapeutic efficacy is not only based in their role regulating the  
313 innate immune response, but it is different depending on the type of bacteria. Previous study  
314 showed the antibacterial effect of tamoxifen against *Staphylococcus aureus* (25). In the present  
315 study, we demonstrate the excellent therapeutic efficacy of tamoxifen against susceptible and  
316 MDR *A. baumannii*, *P. aeruginosa* and *E. coli*, even though this efficacy is slightly lower against  
317 *P. aeruginosa*. However, tamoxifen reduced the migration of immune cells from bone marrow to  
318 blood in mice infected by these three pathogens at similar levels. A possible explanation could be  
319 the involvement of an additional independent immune response mechanism. This hypothesis is in  
320 agreement with the results we obtained in neutropenic mice, in which tamoxifen has a  
321 therapeutic efficacy against *A. baumannii* and *E. coli*, but not against *P. aeruginosa*. In addition,  
322 the three major active metabolites of tamoxifen, 4-hydroxytamoxifen, endoxifen and N-  
323 desmethyltamoxifen, as a consequence of its extensive metabolization by cytochrome P450  
324 enzymes (20), present bactericidal activity in monotherapy against *A. baumannii* and *E. coli*, but  
325 not against *P. aeruginosa*. These results are consistent with a therapeutic efficacy of tamoxifen  
326 depending on antibacterial activity, as addition to the immune response mechanisms.

327 Together, these data indicate that treatment with tamoxifen may be useful for patients with  
328 infections by Gram-negative bacilli.

329

330 **Materials and Methods**

331 **Reagents**

332 Tamoxifen, N-desmetyltamoxifen, endoxifen and 4-hydroxytamoxifen, porcine mucin, protease  
333 inhibitors were obtained from Sigma, Spain. Cyclophosphamide was obtained from Baxter,  
334 Spain.

335

336 **Bacterial strains**

337 Reference *A. baumannii* ATCC 17978 (45), *P. aeruginosa* PAO1 (46) and *E. coli* ATCC 25922  
338 (47) strains were used. We also used 2 clinical susceptible (Ab9) and multidrug-resistant (MDR)  
339 (Ab186) *A. baumannii* from REIPI-GEIH 2010 collection (5), 2 clinical susceptible (Pa39) and  
340 MDR (Pa238) *P. aeruginosa* from REIPI-GEIH 2008 collection (48), and 2 clinical susceptible  
341 (C1-7-LE) and MDR (EcMCR<sup>+</sup>, carrying *mcr-1* gene) *E. coli* (49, 50). We also used a collection  
342 of *A. baumannii* and *E. coli* clinical strains from REIPI-GEIH 2010 collection and Bact-OmpA  
343 collection (51, 52).

344

345 **Animals**

346 Immunocompetent C57BL/6 female mice (16-18 g) were obtained from the University of Seville  
347 facility. MCP-1 KO mice were generated with C57BL/6 background and obtained from Jackson  
348 Laboratory, USA. All mice had sanitary status of murine pathogen free and were assessed for  
349 genetic authenticity and housed in regulation cages with food and water ad libitum. This study  
350 was carried out in strict accordance with the protocol approved by the Committee on the Ethics  
351 of Animal Experiments of the University Hospital of Virgen del Rocío, Seville (0704-N-18). All  
352 surgery was performed under sodium thiopental anaesthesia and all efforts were made to  
353 minimize suffering.



354

355 ***Immunosuppressed mice***

356 Blood frequencies of monocytes and neutrophils were reduced with cyclophosphamide treatment  
357 following the protocol of Zuluaga *et al.* (29). Immunocompetent C57BL/6 female mice were  
358 treated with cyclophosphamide at 100 and 150 mg/kg at day 4 and 1, respectively, before the  
359 bacterial infection.

360

361 ***A. baumannii, P. aeruginosa and E. coli peritoneal sepsis models***

362 Murine peritoneal sepsis models with *A. baumannii*, *P. aeruginosa* or *E. coli* strains were  
363 established by ip. inoculation of the bacteria in immunocompetent and neutropenic mice (2).  
364 Briefly, 6 mice for each group were inoculated with the minimal bacterial lethal dose 100  
365 (MLD100) of the bacterial suspensions mixed in a 1:1 ratio with a saline solution containing  
366 10% (w/v) porcine mucin. The MLD100 of ATCC 17978, Ab9, Ab186, PAO1, Pa39, Pa238,  
367 ATCC 25922, C1-7-LE and EcMCR-1<sup>+</sup> were 3.2, 5.9, 5.0, 4.9, 3.85, 6.7, 4.7, 2.91 and 6 log  
368 CFU/mL, respectively. Mortality was recorded over 3 or 7 days. After the death or sacrifice of  
369 the mice at the end of the experimental period, aseptic thoracotomies were performed, and blood  
370 samples were obtained by cardiac puncture. The spleen and lungs were aseptically removed and  
371 homogenized (Stomacher 80; Tekmar Co., USA) in 2 mL of sterile NaCl 0.9% solution. Ten-fold  
372 dilutions of the homogenized spleen, lungs and blood were plated onto Sheep blood agar (Becton  
373 Dickinson Microbiology Systems, USA) for quantitative cultures. If no growth was observed  
374 after plating the whole residue of the homogenized tissue and blood, a logarithm value  
375 corresponding to the limit of detection of the method (1 CFU) is assigned.

376

377 ***Therapeutic effect of tamoxifen in immunocompetent murine models of peritoneal sepsis***

378 The immunocompetent murine peritoneal sepsis models by *A. baumannii* (ATCC 17978, Ab9  
379 and Ab186), *P. aeruginosa* (PAO1, Pa39 and Pa238), or *E. coli* (ATCC 25922, C1-7-LE and  
380 EcMCR-1<sup>+</sup>) strains were established by ip. inoculation of the bacteria in immunocompetent  
381 mice. Briefly, 6 animals of each group were infected ip. with 0.5 mL of the MLD100 of each  
382 strain mixed 1:1 with 10% porcine mucin. Tamoxifen therapy was administered for 3 days at one  
383 safe dose of 80 mg/kg/d before bacterial inoculation. Mice were randomly ascribed to the  
384 following groups: 1). controls (without treatment), and 2). Tamoxifen administered at  
385 80 mg/kg/d ip. for 3 days before bacterial inoculation with each strain. Mortality and bacterial  
386 loads in tissues and blood were determined as in “*A. baumannii*, *P. aeruginosa* and *E. coli*  
387 peritoneal sepsis models” section.

388

389 ***Therapeutic effect of tamoxifen in immunosuppressed murine models of peritoneal sepsis***

390 The neutropenic murine peritoneal sepsis models by *A. baumannii* ATCC 17978, *P. aeruginosa*  
391 PAO1 or *E. coli* ATCC 25922 strains were established by ip. inoculation of the bacteria in  
392 neutropenic mice. Briefly, animals (6 mice for each group) were infected ip. with 0.5 mL of the  
393 MLD100 of each strain mixed 1:1 with 10% porcine mucin. Tamoxifen therapy, mortality and  
394 bacterial loads in tissues and blood were determined as in “Therapeutic effect of tamoxifen in  
395 immunocompetent murine models of peritoneal sepsis” section.

396

397 ***Flow cytometry***

398 Expanded details of all methods are given in the supplementary material.

399

400 ***Cytokine assays***

401 Blood samples were collected from periorbital plexuses of mice infected with DML100 of  
402 ATCC 17978, PAO1 and ATCC 25922 and pretreated or not with tamoxifen as previously  
403 described (11). Serum levels of murine MCP-1, IL-6, IL-18 and TNF- $\alpha$  were collected 6 and 24  
404 h post-bacterial infection without or with tamoxifen treatment. MCP-1, IL-6, IL-18 and TNF- $\alpha$   
405 levels were determined by ELISA kit (ThermoFisher, for MCP-1) and (Affymetrix eBioscience,  
406 for IL-6, IL-18 and TNF- $\alpha$ ) in accordance with the manufacturer's instructions. Furthermore,  
407 extracellular medium of RAW 264.7 macrophages cells infected with 8 log CFU/mL of ATCC  
408 17978, PAO1 and ATCC 25922, and pre-incubated or not with 2.5 mg/L tamoxifen for 24 h  
409 previous was collected to determine the MCP-1 levels.

410

411 ***Cell culture and infection***

412 Expanded details of all methods are given in the supplementary material.

413

414 ***Western blot immunoblotting***

415 Expanded details of all methods are given in the supplementary material.

416

417 ***Macrophages adhesion assay***

418 RAW 264.7 cells were pretreated with 2.5 mg/L tamoxifen for 2, 6 and 24 h; and infected with  
419 ATCC 17978, PAO1 and ATCC 25922 strains (MOI 1:100) for 2 h with 5% CO<sub>2</sub> at 37°C.  
420 Subsequently, infected RAW 264.7 macrophages cells were washed five times with prewarmed  
421 PBS and lysed with 0.5 % Triton X-100. Diluted lysates were plated onto Sheep blood agar and  
422 incubated at 37 °C for 24 h for enumeration of developed colonies and then the determination of

423 the number of bacteria that attached and invaded RAW 264.7 cells. Alternatively, we determined  
424 the concentration of the extracellular medium bacteria by plating diluted extracellular medium  
425 onto Sheep blood agar.

426 HL-60 neutrophils were pretreated with 2.5 mg/L for 2 and 6 h; and infected with ATCC 17978,  
427 PAO1 and ATCC 25922 strains (MOI 1:100) for 2 h with 5% CO<sub>2</sub> at 37°C. Subsequently, HL-  
428 60 neutrophils were washed five times with prewarmed PBS by centrifugation and lysed with 0.5  
429 % Triton X-100. Diluted lysates were plated onto Sheep blood agar and incubated at 37 °C for 24  
430 h for enumeration of developed colonies and then the determination of the number of bacteria.  
431 The neutrophil killing index was calculated according to the formula: [(CFU in the absence of  
432 neutrophils – CFU in the presence of neutrophils)/ CFU in the absence of neutrophils] × 100  
433 (53).

434

#### 435 *In vitro susceptibility testing and time-kill experiments*

436 The MICs of N-desmethyltamoxifen, endoxifen and 4-hydroxytamoxifen and the mixture of the 3  
437 tamoxifen metabolites against *A. baumannii* and *E. coli* clinical strains were determined by  
438 microdilution assay in two independent experiments, in accordance with CLSI guideline (54).

439 Time-kill kinetic assays of the Ab9 and EcMCR<sup>+</sup> strains were conducted in Moeller Hinton  
440 Broth in the presence of the mixture of the 3 tamoxifen metabolites at 4xMIC, and were  
441 performed in duplicate as previously described (54). Drug-free broth was evaluated in parallel as  
442 a control and cultures were incubated at 37°C. Viable counts were determined by serial dilution  
443 at 0, 2, 4 and 8 h after adding the 3 tamoxifen metabolites, and plating 100 µL of control, test  
444 cultures or dilutions at the indicated times onto sheep blood agar plates. Plates were incubated  
445 for 24 h and, after colony counts, the log<sub>10</sub> of viable cells (CFU/mL) was determined.

446

#### 447 ***Analysis of outer membrane proteins (OMPs) by SDS-PAGE***

448 Bacterial cells of MDR *A. baumannii* and MDR *E. coli* were grown in LB broth to the  
449 logarithmic phase, incubated with 2 and 16 mg/L of tamoxifen metabolites mixture, respectively,  
450 for 4 or 24 h and lysed by sonication. OMPs were extracted with sodium lauroylsarcosinate  
451 (Sigma, Spain) and recovered by ultracentrifugation as described previously (43). The OMP  
452 profiles were determined by sodium dodecyl sulfate polyacrylamide gel electrophoresis (SDS-  
453 PAGE) using 10% SDS gels and 6 µg protein of OMPs, followed by Simply Blue SafeStain gel  
454 (Invitrogen, Spain).

455

#### 456 ***Membrane permeability assays***

457 Bacterial suspensions (adjusted to O.D<sub>600</sub> = 0.2) of MDR *A. baumannii* and MDR *E. coli* were  
458 placed into a 96-well plate, incubated with 2 and 16 mg/L of tamoxifen metabolites mixture,  
459 respectively, and mixed in a solution of PBS containing Ethidium Homodimer-1 (EthD-1)  
460 (1:500) (Invitrogen, USA). After 10 min of incubation, fluorescence was monitored during 160  
461 min using Thyphoon FLA 9000 laser scanner (GE Healthcare Life Sciences, USA) and  
462 quantified by ImageQuant TL software (GE Healthcare Life Sciences, USA). Bacterial counts  
463 were obtained at the beginning and at the end of the experiment to ensure that metabolites  
464 mixture was not presenting bactericidal activity against *A. baumannii* and *E. coli* strains.

465

#### 466 ***Statistical analysis***

467 Group data are presented as means ± standard errors of the means (SEM). For *in vitro* studies, the  
468 Student t test was used to determine differences between means. Differences in bacterial spleen,

469 lung and blood concentrations (mean  $\pm$  SEM log<sub>10</sub> CFU per g or mL) were assessed by analysis  
470 of variance (ANOVA) and post-hoc Dunnett's and Tukey's tests. Differences in mortality (%)  
471 between groups were compared by use of the  $\chi^2$  test. *P* values of <0.05 were considered  
472 significant. The SPSS (version 21.0; SPSS Inc.) statistical package was used.

473

## 474 **References**

- 475 1. Rasko DV, Sperandio V. 2010. Anti-virulence strategies to combat bacteria-mediated  
476 disease. *Nat Rev Drug Discov* 9:117-128.
- 477 2. Vila-Farrés X, Parra-Millán R, Sánchez-Encinales V, Varese M, Ayerbe-Algaba R, Bayó N,  
478 Guardiola S, Pachón-Ibáñez ME, Kotev M, García J, Teixidó M, Vila J, Pachón J, Giralt E,  
479 Smani Y. 2017. Combating virulence of Gram-negative bacilli by OmpA inhibition. *Sci Rep*  
480 7:14683.
- 481 3. Smani Y, Domínguez-Herrera J, Ibáñez-Martínez J, Pachón J. 2015. Therapeutic efficacy of  
482 lysophosphatidylcholine in severe infections caused by *Acinetobacter baumannii*.  
483 *Antimicrob Agents Chemother* 59:3920-3924.
- 484 4. Wright GD. 2016. Antibiotic adjuvants: rescuing antibiotics from resistance. *Trends*  
485 *Microbiol* 24:862-871.
- 486 5. Parra Millán R, Jiménez Mejías ME, Sánchez Encinales V, Ayerbe Algaba R, Gutiérrez  
487 Valencia A, Pachón Ibáñez ME, Díaz C, Pérez Del Palacio J, López Cortés LF, Pachón J,  
488 Smani Y. 2016. Efficacy of lysophosphatidylcholine in combination with antimicrobial  
489 agents against *Acinetobacter baumannii* in experimental murine peritoneal sepsis and  
490 pneumonia models. *Antimicrob Agents Chemother* 60:4464-4470.

- 491 6. Miyazaki H, Midorikawa N, Fujimoto S, Miyoshi N, Yoshida H, Matsumoto T. 2017.  
492 Antimicrobial effects of lysophosphatidylcholine on methicillin-resistant *Staphylococcus*  
493 *aureus*. Ther Adv Infect Dis 4:89-94.
- 494 7. Zhao L, KuoLee R, Harris G, Tram K, Yan H, Chen W. 2011. c-di-GMP protects against  
495 intranasal *Acinetobacter baumannii* infection in mice by chemokine induction and enhanced  
496 neutrophil recruitment. Int Immunopharmacol 11:1378-1383.
- 497 8. Nathan C. 2006. Neutrophils and immunity: challenges and opportunities. Nat Rev Immunol  
498 6:173-182.
- 499 9. Shi C, Pamer EG. 2011. Monocyte recruitment during infection and inflammation. Nat Rev  
500 Immunol 11:762-774.
- 501 10. Shi C, Jia T, Mendez-Ferrer S, Hohl TM, Serbina NV, Lipuma L, Leiner I, Li MO, Frenette  
502 PS, Pamer EG. 2011. Bone marrow mesenchymal stem and progenitor cells induce monocyte  
503 emigration in response to circulating toll-like receptor ligands. Immunity 34:590-601.
- 504 11. Yoo JK, Kwon H, Khil LY, Zhang L, Jun HS, Yoon JW. 2005. IL-18 induces monocyte  
505 chemotactic protein-1 production in macrophages through the phosphatidylinositol 3-  
506 kinase/Akt and MEK/ERK1/2 pathways. J Immunol 175:8280-8286.
- 507 12. Bossink AW, Paemen L, Jansen PM, Hack CE, Thijs LG, Van Damme J. 1995. Plasma levels  
508 of the chemokines monocyte chemoattractant proteins-1 and -2 are elevated in human sepsis.  
509 Blood 86:3841-3847.
- 510 13. Yong KK, Chang JH, Chien MH, Tsao SM, Yu MC, Bai KJ, Tsao TC, Yang SF. 2016  
511 Plasma monocyte chemoattractant protein-1 level as a predictor of the severity of  
512 community-acquired pneumonia. Int J Mol Sci 17. pii: E179.

- 513 14. Behjati S, Frank MH. 2009. The effects of tamoxifen on immunity. *Curr Med Chem* 16:  
514 3076-3080.
- 515 15. Seli E, Pehlivan T, Selam B, Garcia-Velasco JA, Arici A. 2002. Estradiol down-regulates  
516 MCP-1 expression in human coronary artery endothelial cells. *Fertil Steril* 77:542-547.
- 517 16. Wang L, Zheng W, Zhang S, Chen X, Hornung D. 2006. Expression of monocyte  
518 chemotactic protein-1 in human endometrial cancer cells and the effect of treatment with  
519 tamoxifen or buserelin. *J Int Med Res* 34:284-290.
- 520 17. Jang WS, Kim S, Podder B, Jyoti MA, Nam KW, Lee BE, Song HY. 2015. Anti-  
521 mycobacterial activity of tamoxifen against drug-resistant and intra-macrophage  
522 *Mycobacterium tuberculosis*. *J Microbiol Biotechnol* 25:946-950.
- 523 18. Jacobs AC, Didone L, Jobson J, Sofia MK, Krysan D, Dunman PM. 2013. Adenylate kinase  
524 release as a high-throughput-screening-compatible reporter of bacterial lysis for  
525 identification of antibacterial agents. *Antimicrob Agents Chemother* 57:26-36.
- 526 19. Poirel L, Jayol A, Nordmann P. 2017. Polymyxins: Antibacterial Activity, susceptibility  
527 testing, and resistance mechanisms encoded by plasmids or chromosomes. *Clin Microbiol*  
528 *Rev* 30:557-596.
- 529 20. Hoskins JM, Carey LA, McLeod HL. 2009. CYP2D6 and tamoxifen: DNA matters in breast  
530 cancer. *Nat Rev Cancer* 9:576-586.
- 531 21. Swirski FK, Nahrendorf M, Etzrodt M, Wildgruber M, Cortez-Retamozo V, Panizzi P,  
532 Figueiredo JL, Kohler RH, Chudnovskiy A, Waterman P, Aikawa E, Mempel TR, Libby P,  
533 Weissleder R, Pittet MJ. 2009. Identification of splenic reservoir monocytes and their  
534 deployment to inflammatory sites. *Science* 325:612-616.



- 535 22. Robbins CS, Chudnovskiy A, Rauch PJ, Figueiredo JL, Iwamoto Y, Gorbatov R, Etzrodt M,  
536 Weber GF, Ueno T, van Rooijen N, Mulligan-Kehoe MJ, Libby P, Nahrendorf M, Pittet MJ,  
537 Weissleder R, Swirski FK. 2012. Extramedullary hematopoiesis generates Ly-6C(high)  
538 monocytes that infiltrate atherosclerotic lesions. *Circulation* 125:364-374.
- 539 23. Handel TM, Johnson Z, Crown SE, Lau EK, Proudfoot AE. 2005. Regulation of protein  
540 function by glycosaminoglycans-as exemplified by chemokines. *Annu Rev Biochem* 74:385-  
541 410.
- 542 24. Deshmane SL, Kremlev S, Amini S, Sawaya BE. 2009. Monocyte chemoattractant protein-1  
543 (MCP-1): an overview. *J Interferon Cytokine Res* 29:313-326.
- 544 25. Corriden R, Hollands A, Olson J, Derieux J, Lopez J, Chang JT, Gonzalez DJ, Nizet V. 2015.  
545 Tamoxifen augments the innate immune function of neutrophils through modulation of  
546 intracellular ceramide. *Nat Commun* 6:8369.
- 547 26. Yu M, Jiang M, Chen Y, Zhang S, Zhang W, Yang X, Li X, Li Y, Duan S, Han J, Duan Y.  
548 2016. Inhibition of macrophage CD36 expression and cellular oxidized low density  
549 lipoprotein (oxLDL) accumulation by tamoxifen: a peroxisome proliferator-activated  
550 receptor (PPAR)gamma-dependent mechanism. *J Biol Chem* 291:16977-16989.
- 551 27. Luo G, Spellberg B, Gebremariam T, Bolaris M, Lee H, Fu Y, French SW, Ibrahim AS.  
552 2012. Diabetic murine models for *Acinetobacter baumannii* infection. *J Antimicrob*  
553 *Chemother* 67:1439-1445.
- 554 28. Pletzer D, Mansour SC, Wuerth K, Rahanjam N, Hancock RE. 2017. New mouse model for  
555 chronic infections by Gram-negative bacteria enabling the study of anti-infective efficacy  
556 and host-microbe interactions. *mBio* 8:e00140-17.

- 557 29. Zuluaga AF, Salazar BE, Rodriguez CA, Zapata AX, Agudelo M, Vesga O. 2006.  
558 Neutropenia induced in outbred mice by a simplified low-dose cyclophosphamide regimen:  
559 characterization and applicability to diverse experimental models of infectious diseases.  
560 BMC Infect Dis 6:55.
- 561 30. Miro-Canturri A, Ayerbe-Algaba R, Smani Y. 2019. Drugs repurposing for the treatment of  
562 bacterial and fungal infections. Front. Microbiol. 10:41.
- 563 31. Ashburn TT, Thor KB 2004. Drug repositioning: identifying and developing new uses for  
564 existing drugs. Nat Rev Drug Discov 3:673-683.
- 565 32. Serbina NV, Hohl TM, Cherny M, Pamer EG. 2009. Selective expansion of the monocytic  
566 lineage directed by bacterial infection. J. Immunol. 183:1900-1910.
- 567 33. Serbina NV, Kuziel W, Flavell R, Akira S, Rollins B, Pamer EG. 2003. Sequential MyD88-  
568 independent and -dependent activation of innate immune responses to intracellular bacterial  
569 infection. Immunity 19:891-901.
- 570 34. Balamayooran G, Batra S, Balamayooran T, Cai S, Jeyaseelan S. 2011. Monocyte  
571 chemoattractant protein 1 regulates pulmonary host defense via neutrophil recruitment during  
572 *Escherichia coli* infection. Infect Immun 79:2567-2577.
- 573 35. Jia T, Serbina NV, Brandl K, Zhong MX, Leiner IM, Charo IF, Pamer EG. 2008. Additive  
574 roles for MCP-1 and MCP-3 in CCR2-mediated recruitment of inflammatory monocytes  
575 during *Listeria monocytogenes* infection. J Immunol 180:6846-6853.
- 576 36. Tsou CL, Peters W, Si Y, Slaymaker S, Aslanian AM, Weisberg SP, Mack M, Charo IF.  
577 2007. Critical roles for CCR2 and MCP-3 in monocyte mobilization from bone marrow and  
578 recruitment to inflammatory sites. J Clin Inv 117:902-909.

- 579 37. Burdon PC, Martin C, Rankin SM. 2005. The CXC chemokine MIP-2 stimulates neutrophil  
580 mobilization from the rat bone marrow in a CD49d-dependent manner. *Blood* 105:2543-  
581 2548.
- 582 38. Rankin SM. 2010. The bone marrow: a site of neutrophil clearance. *J Leuk. Biol* 88:241-251.
- 583 39. Dominguez PM, Ardavin C. 2010. Differentiation and function of mouse monocyte-derived  
584 dendritic cells in steady state and inflammation. *Immunol Rev* 234:90-104.
- 585 40. Serbina NV, Salazar-Mather TP, Biron CA, Kuziel WA, Pamer EG. 2003. TNF/iNOS-  
586 producing dendritic cells mediate innate immune defense against bacterial infection.  
587 *Immunity* 19:59-70.
- 588 41. Bosschaerts T, Guilliams M, Stijlemans B, Morias Y, Engel D, Tacke F, Hérin M, De  
589 Baetselier P, Beschin A. 2010. Tip-DC development during parasitic infection is regulated by  
590 IL-10 and requires CCL2/CCR2, IFN-gamma and MyD88 signaling. *PLoS Pathog* 6:  
591 e1001045.
- 592 42. Nalbandian G, Paharkova-Vatchkova V, Mao A, Nale S, Kovats S. 2005. The selective  
593 estrogen receptor modulators, tamoxifen and raloxifene, impair dendritic cell differentiation  
594 and activation. *J Immunol* 175:2666-2675.
- 595 43. Smani Y, Docobo-Pérez F, López-Rojas R, Domínguez-Herrera J, Ibáñez-Martínez J, Pachón  
596 J. 2012. Platelet-activating factor receptor initiates contact of *Acinetobacter baumannii*  
597 expressing phosphorylcholine with host cells. *J Biol Chem* 287:26901-26910.
- 598 44. Parra-Millán R, Guerrero-Gómez D, Ayerbe-Algaba R, Pachón-Ibáñez ME, Miranda-Vizuete  
599 A, Pachón J, Smani Y. 2018. Intracellular trafficking and persistence of *Acinetobacter*  
600 *baumannii* requires transcription factor EB. *mSphere* 3:e00106-18.

- 601 45. Baumann P, Doudoroff M, Stanier MR. 1968. A 377 study of the *Moraxella* group. II.  
602 Oxidative negative species (genus *Acinetobacter*). *J Bacteriol* 95:1520-1541.
- 603 46. Holloway IW. 1955. Genetic recombination in *Pseudomonas aeruginosa*. *J Gen Microbial*  
604 13:572-681.
- 605 47. *Escherichia coli* (Migula) Castellani and Chalmers (ATCC® 25922™). 1946. FDA strain  
606 Seattle [DSM 1103, NCIB 12210].
- 607 48. Peña C, Suarez C, Gozalo M, Murillas J, Almirante B, Pomar V, Aguilar M, Granados A,  
608 Calbo E, Rodríguez-Baño J, Rodríguez F, Tubau F, Martínez-Martínez L, Oliver A. 2012.  
609 Prospective multicenter study of the impact of carbapenem resistance on mortality in  
610 *Pseudomonas aeruginosa* bloodstream infections. *Antimicrob Agents Chemother* 56:1265-  
611 1272.
- 612 49. Ayerbe Algaba R, Álvarez-Marín R, Praena J, Smani Y. 2019. *Escherichia coli* causing  
613 meningitis in an adult: A case report and experimental characterization of its virulence.  
614 *Enferm Infecc Microbiol Clin* 37:418-419.
- 615 50. Yanat B, Machuca J, Yahia RD, Touati A, Pascual Á, Rodríguez-Martínez JM. 2016. First  
616 report of the plasmid-mediated colistin resistance gene *mcr-1* in a clinical *Escherichia coli*  
617 isolate in Algeria. *Int J Antimicrob Agents* 48:760-761.
- 618 51. Fernández-Cuenca F, Tomás-Carmona M, Caballero-Moyano F, Bou G, Martínez-Martínez  
619 L, Vila J, Pachón J, Cisneros JM, Rodríguez-Baño J, Pascual A. 2012. *In vitro* activity of 18  
620 antimicrobial agents against clinical isolates of *Acinetobacter* spp.: multicenter national study  
621 GEIH-REIPI-Ab 2010. *Enferm Infecc Microbiol Clin* 31:4-9.
- 622 52. Rodríguez Villodres A, Alvarez Marín R, Durán Lobato M, Pachón Ibáñez ME, Aznar J,  
623 Pachón Díaz J, Lepe JA, Smani Y. Overexpression of outer membrane protein A by

624 *Escherichia coli* as a risk factor for mortality in bloodstream infection, presented at the 29th  
625 European Congress of Clinical Microbiology and Infectious Diseases, Amsterdam,  
626 Netherlands, 13 to 16 April 2019.

627 53. Maekawa T, Krauss JL, Abe T, Jotwani R, Triantafilou M, Triantafilou K, Hashim A, Hoch  
628 S, Curtis MA, Nussbaum G, Lambris JD, Hajishengallis G. 2014. *Porphyromonas gingivalis*  
629 manipulates complement and TLR signaling to uncouple bacterial clearance from  
630 inflammation and promote dysbiosis. *Cell Host Microbe* 15(6):768-78.

631 54. *Clinical and Laboratory Standards Institute. Performance Standards for Antimicrobial*  
632 *Susceptibility Testing* (Twenty-Seventh Informational Supplement M100-S27. CLSI, Wayne,  
633 PA, USA, 2017).

634

#### 635 **Acknowledgments:**

636 We thank Dr. José Manuel Rodríguez Martínez for the kind gift of the EcMCR+ strain.

637 **Funding:** This study was supported by the Instituto de Salud Carlos III, Proyectos de  
638 Investigación en Salud (grants CP15/00132, PI16/01378 and PI19/01453) and by Plan Nacional  
639 de I+D+i 2013- 2016 and Instituto de Salud Carlos III, Subdirección General de Redes y Centros  
640 de Investigación Cooperativa, Ministerio de Ciencia, Innovación y Universidades, Spanish  
641 Network for Research in Infectious Diseases (REIPI RD16/0016/0009) - co- financed by  
642 European Development Regional Fund “A way to achieve Europe”, Operative program  
643 Intelligent Growth 2014-2020. Younes Smani is supported by the Subprograma Miguel Servet  
644 Tipo I from the Ministerio de Economía y Competitividad of Spain (CP15/00132).

645 **Author contributions:** R.T., J.P., Y.S. conceived the study and designed the experiments.

646 A.M.C., R.A.A, R.T, performed experiments and interpreted data. J.P. and Y.S. wrote the

647 manuscript with the input of all the other authors.

648 **Competing interests:** No conflicts of interest to declare.

649

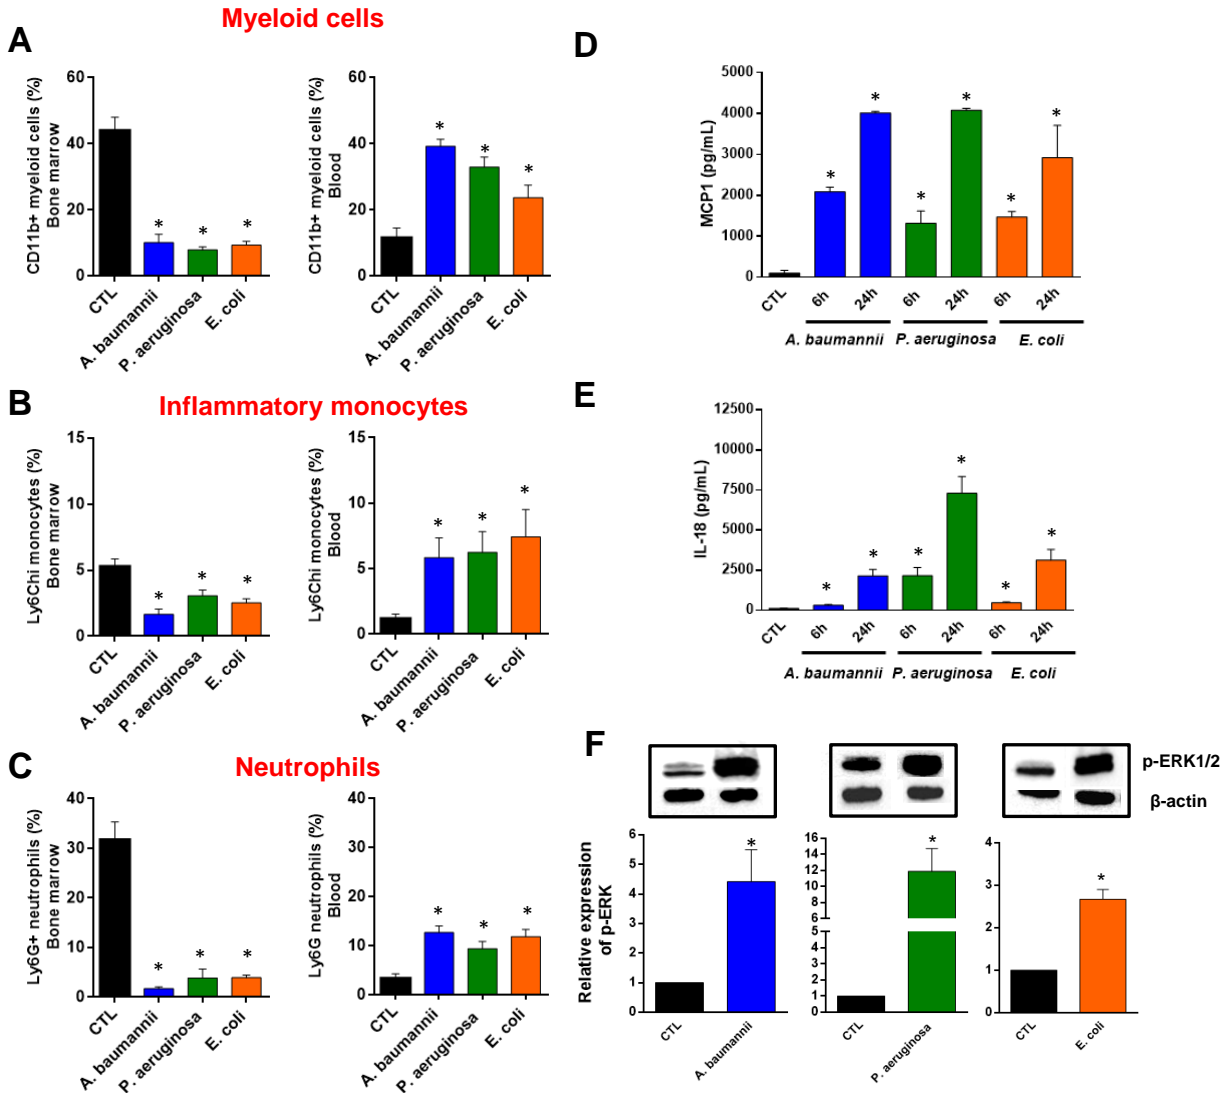

650

651 **Figure 1. Bone marrow immune cells migration to blood in response to MCP-1 and IL-18**

652 **during bacterial infection. (A) Myeloid cells, (B) inflammatory monocytes and (C) neutrophils**

653 **were identified as CD11b+, CD11b+Ly6Chi and CD11b+Ly6G+ by flow cytometry,**

654 **respectively, in bone marrow and blood of mice infected with MLD100 of *A. baumannii***

655 **ATCC17978, *P. aeruginosa* PAO1 or *E. coli* ATCC25922 strains for 24h. (D and E) Serum**

656 **MCP-1 and IL-18 levels (ELISA assays), 6 and 24 h post-infection, in mice infected with**

657 **minimal lethal dose 100 (MLD100) of *A. baumannii* ATCC17978, *P. aeruginosa* PAO1 or *E.***

658 ***coli* ATCC25922 strains. (F) RAW 264.7 cells were infected with *A. baumannii* ATCC17978, *P.***

659 *aeruginosa* PAO1 or *E. coli* ATCC25922 strains for 2 h and proteins were collected for  
660 Phospho-p44/42 MAPK (Erk1/2) and  $\beta$ -actin immunoblotting. Data are representative of six  
661 mice per group, and expressed as mean  $\pm$  SEM. \* $P$ <0.05: infected vs. CTL. CTL: non-infected  
662 mice.  
663



A

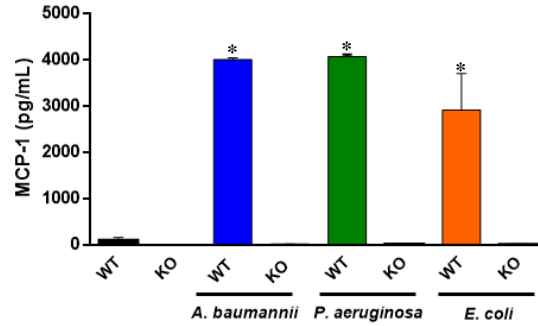

664

B

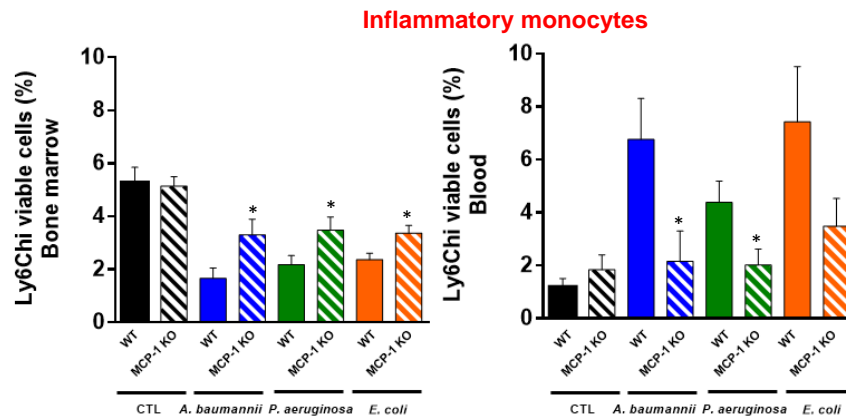

C

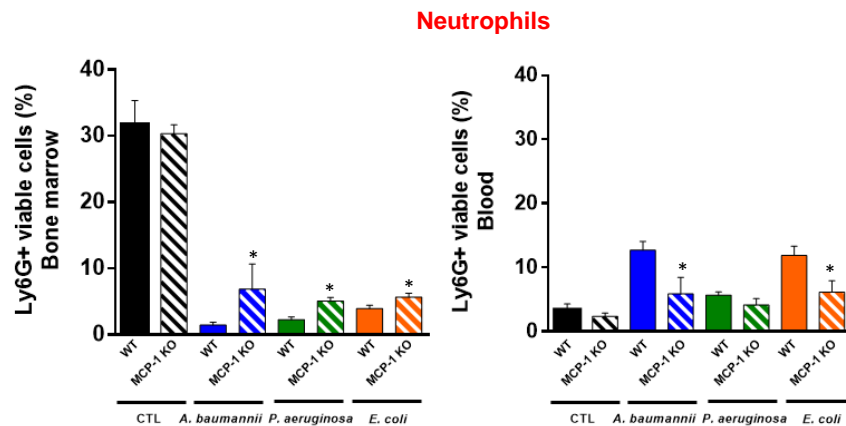

665

666 **Figure 2. Role of MCP-1 in the bone marrow immune cells migration to blood during**

667 **bacterial infection.** (A) Wild-type and MCP-1 KO mice were infected with minimal lethal dose

668 100 (MLD100) of *A. baumannii* ATCC17978, *P. aeruginosa* PAO1 or *E. coli* ATCC25922

669 strains. Twenty-four hours post-infection, serum was harvested for MCP-1 ELISA assays. (B)

670 Inflammatory monocytes, and (C) neutrophils were identified as CD11b+Ly6Chi and

671 CD11b+Ly6G+ by flow cytometry, respectively, in bone marrow and blood of wild-type and

672 MCP-1 KO mice infected with MLD100 of *A. baumannii* ATCC17978, *P. aeruginosa* PAO1 or  
673 *E. coli* ATCC25922 strains for 24 h. Data are representative of six mice per group, and expressed  
674 as mean  $\pm$  SEM. \* $P$ <0.05: WT vs. MCP-1 KO. WT: wild-type, MCP-1 KO: mice lacking MCP-  
675 1, CTL: non-infected mice.

676

**A**

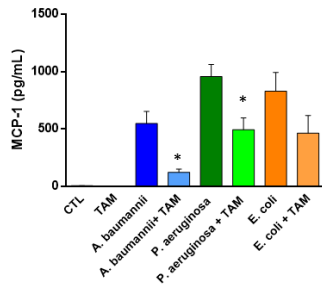

**B**

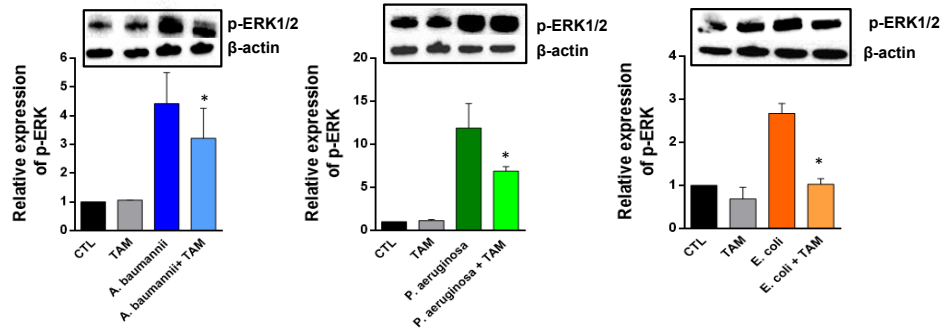

**C**

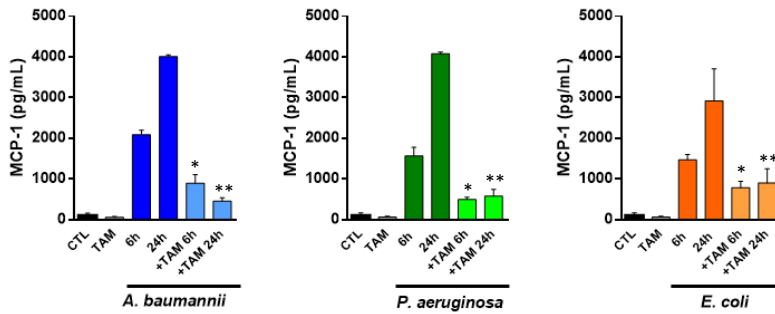

**D**

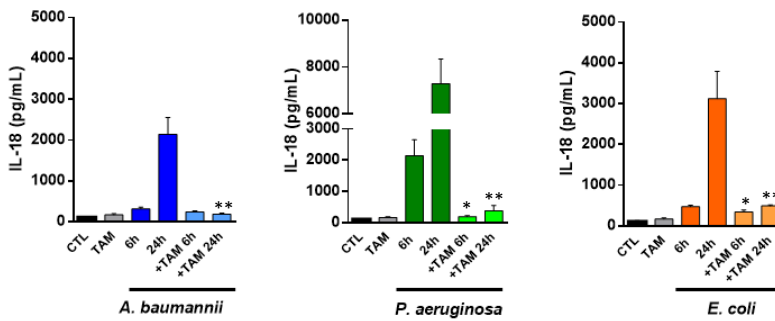

678 **Figure 3. Tamoxifen reduces, after bacterial infection, the release of MCP-1 and IL-18 in**  
679 ***vitro* and *in vivo*, and the ERK phosphorylation *in vitro*.** (A and B) RAW 264.7 cells were  
680 treated with 2.5 mg/L of tamoxifen for 24 h and infected with *A. baumannii* ATCC17978, *P.*  
681 *aeruginosa* PAO1 or *E. coli* ATCC25922 strains for 2 h. MCP-1 levels and ERK-phosphorylation  
682 were determined by ELISA and immunoblotting assays, respectively. Data are representative of  
683 three independent experiments, and expressed as mean  $\pm$  SEM. (C and D) Mice received  
684 tamoxifen (80 mg/kg/d, for 3 days) and infected with minimal lethal dose 100 (MLD100) of *A.*  
685 *baumannii* ATCC17978, *P. aeruginosa* PAO1 or *E. coli* ATCC25922 strains. Six and twenty-  
686 four hours post-infection, serum was harvested for MCP-1 and IL-18 ELISA assays. Data are  
687 representative of 6 mice per group and are expressed as mean  $\pm$  SEM. \* $P$ <0.05: treated vs. CTL,  
688 \*\* $P$ <0.05: treated vs. CTL. CTL: non-infected mice. TAM: tamoxifen.

689

**A**

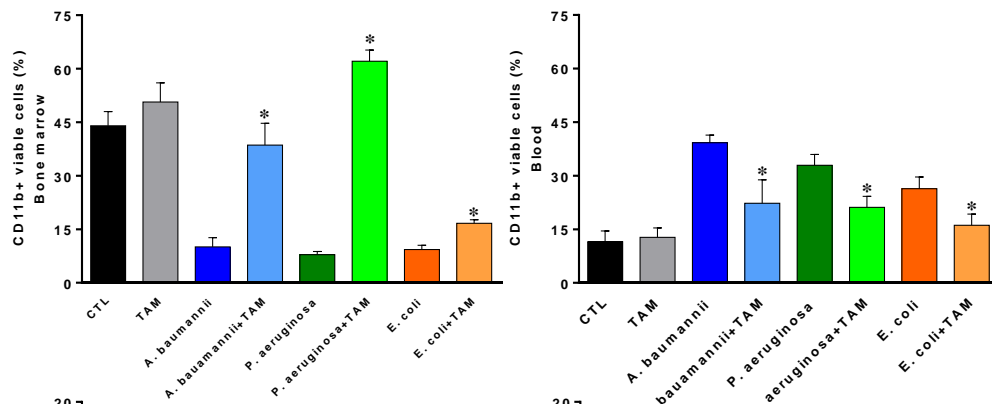

**B**

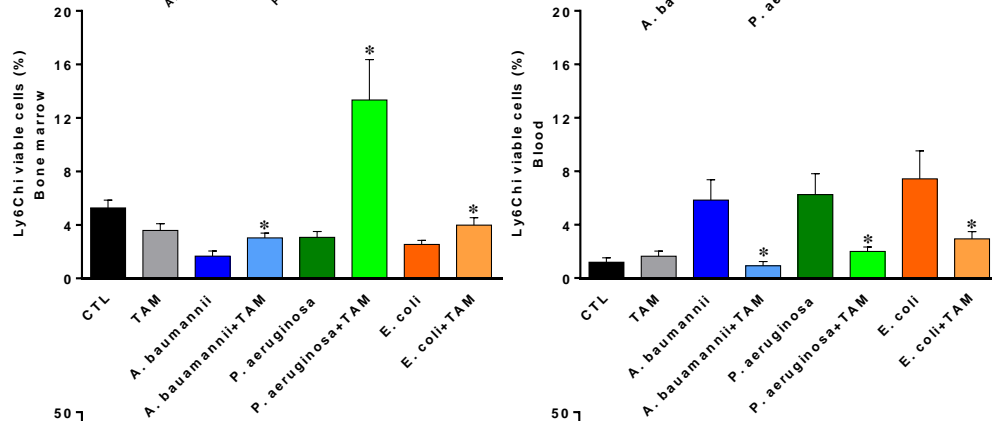

**C**

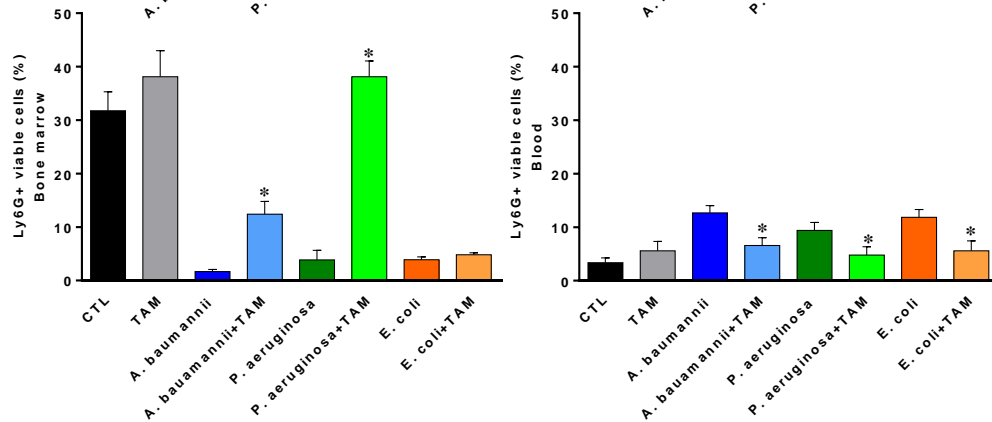

690

691 **Figure 4. Tamoxifen impairs, after bacterial infection, the migration of immune cells from**

692 **bone marrow to blood through MCP-1 regulation.** Mice received tamoxifen (80 mg/kg/d, for

693 3 days) and infected with minimal lethal dose 100 of *A. baumannii* ATCC17978, *P. aeruginosa*

694 PAO1 or *E. coli* ATCC25922 strains. Twenty-four hours post-infection, (A) myeloid cells, (B)

695 inflammatory monocytes and (C) neutrophils were identified as CD11b+, CD11b+Ly6Chi and

696 CD11b+Ly6G+ by flow cytometry, respectively, in bone marrow and blood of mice. Data are

697 representative of 6 mice per group and are expressed as mean  $\pm$  SEM. \* $P < 0.05$ : treated vs. CTL.

698 CTL: non-infected mice, TAM: tamoxifen.

699

700

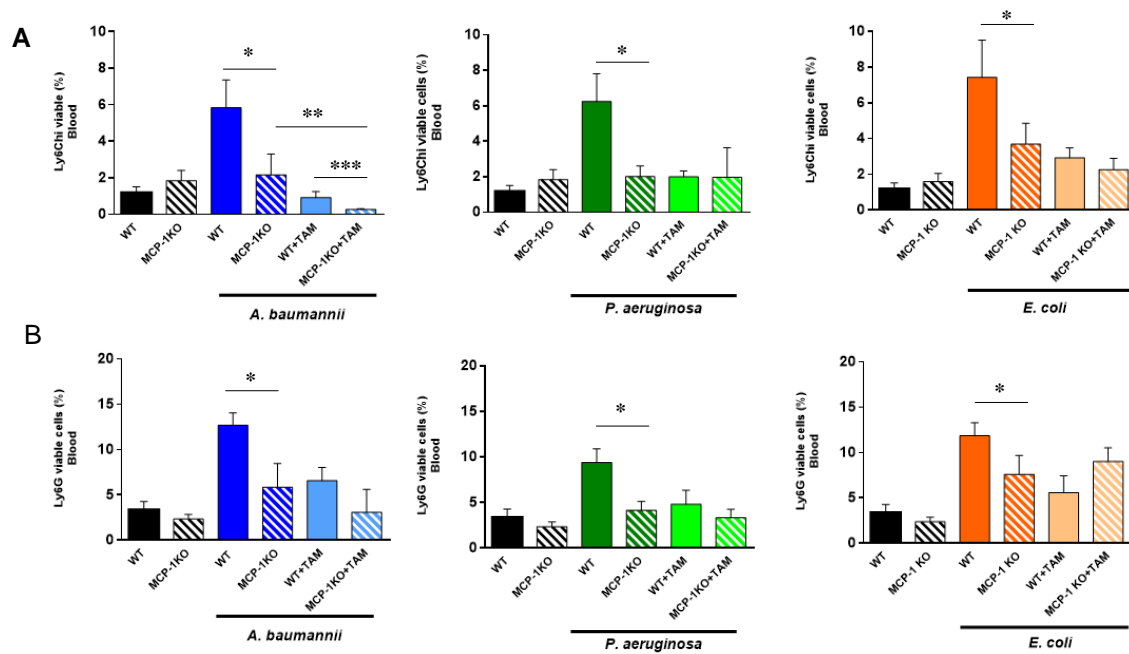

701

702 **Figure 5. Tamoxifen impairs, after bacterial infection in mice MCP-1-deficient, the**

703 **migration of immune cells from bone marrow to blood through MCP-1 regulation. (A) WT**

704 **and MCP-1 KO mice received tamoxifen (80 mg/kg/d, for 3 days) and infected with minimal**

705 **lethal dose 100 of *A. baumannii* ATCC17978, *P. aeruginosa* PAO1 or *E. coli* ATCC25922**

706 **strains. Twenty-four hours post-infection, (A) inflammatory monocytes and (B) neutrophils were**

707 **identified as CD11b+, CD11b+Ly6Chi and CD11b+Ly6G+ by flow cytometry, respectively, in**

708 **bone marrow and blood of mice. Data are representative of 6 mice per group and are expressed**

709 **as mean ± SEM. CTL: non-infected mice. \*P<0.05: infected WT vs. infected MCP-1 KO,**

710 **\*\*P<0.05: infected MCP-1 KO vs. infected MCP-1 KO + TAM, \*\*\*P<0.05: infected WT +**

711 **TAM vs. infected MCP-1 KO + TAM. CTL: non-infected mice, TAM: tamoxifen.**

712

713

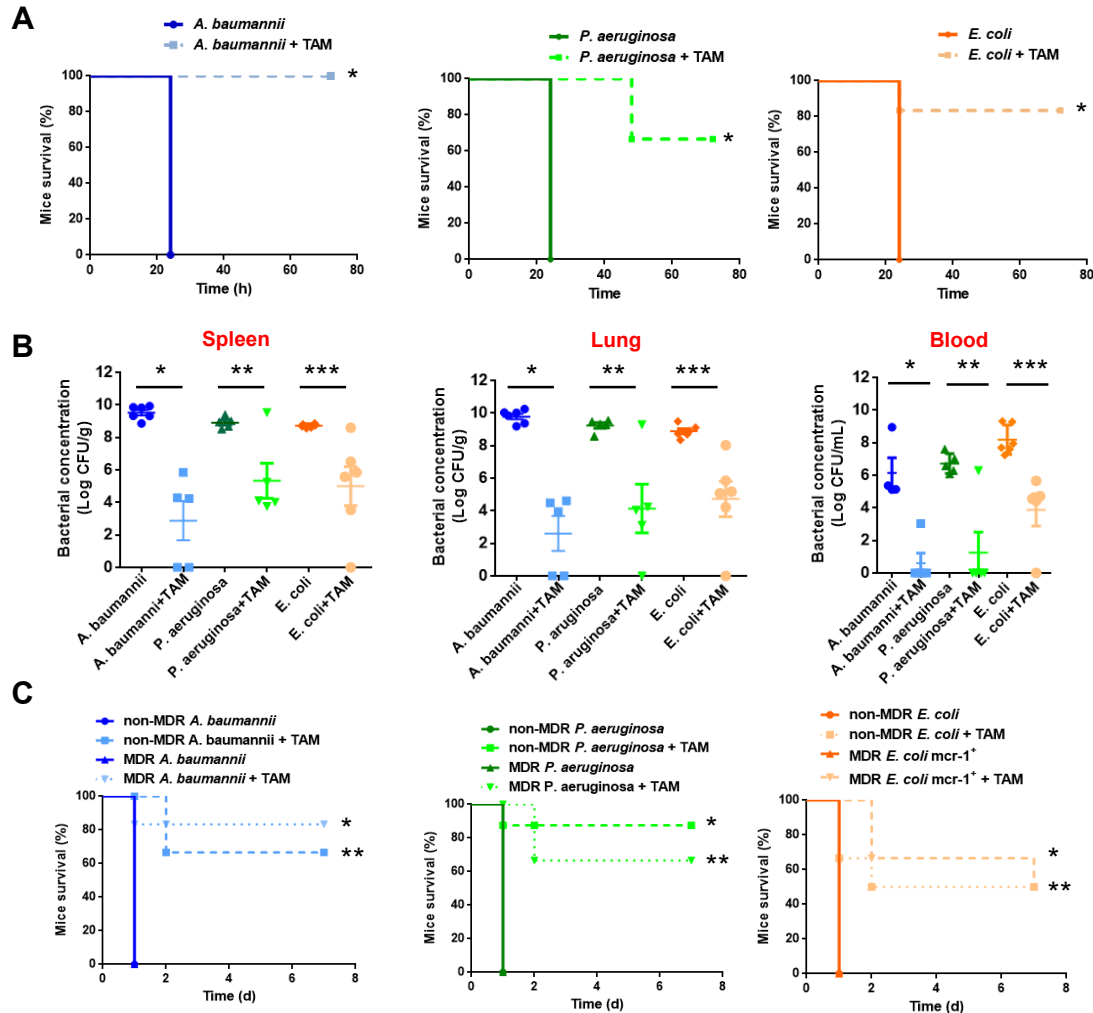

714

715 **Figure 6. Tamoxifen shows therapeutic efficacy in murine sepsis models by GNB.** (A) Mice  
716 survival was monitored during 3 days for mice infected with minimal lethal dose 100 (MLD100)  
717 of *A. baumannii* ATCC17978, *P. aeruginosa* PAO1 or *E. coli* ATCC25922 strains treated or not  
718 with 3 i.p. doses of tamoxifen (80 mg/kg/d, for 3 days). (B) Bacterial burden in spleen, lung and  
719 blood of mice treated or not with 3 ip. doses of tamoxifen (80 mg/kg/d, for 3 days), and infected  
720 with MLD100 of *A. baumannii* ATCC17978, *P. aeruginosa* PAO1 or *E. coli* ATCC25922  
721 strains. (C) Mice survival was monitored during 7 days for 6 mice infected with MLD100 of  
722 non-MDR and MDR *A. baumannii* (Ab9 and Ab186), *P. aeruginosa* (Pa39 and Pa238) or *E. coli*



723 (C1-7-LE and EcMCR+) strains treated or not with 3 i.p. doses of tamoxifen (80 mg/kg/d, for 3  
724 days). \* $P < 0.05$ : treated vs. untreated, \*\* $P < 0.05$ : treated vs. untreated, \*\*\* $P < 0.05$ : treated vs.  
725 untreated. TAM: tamoxifen, MDR: multidrug-resistant.

726

727

728

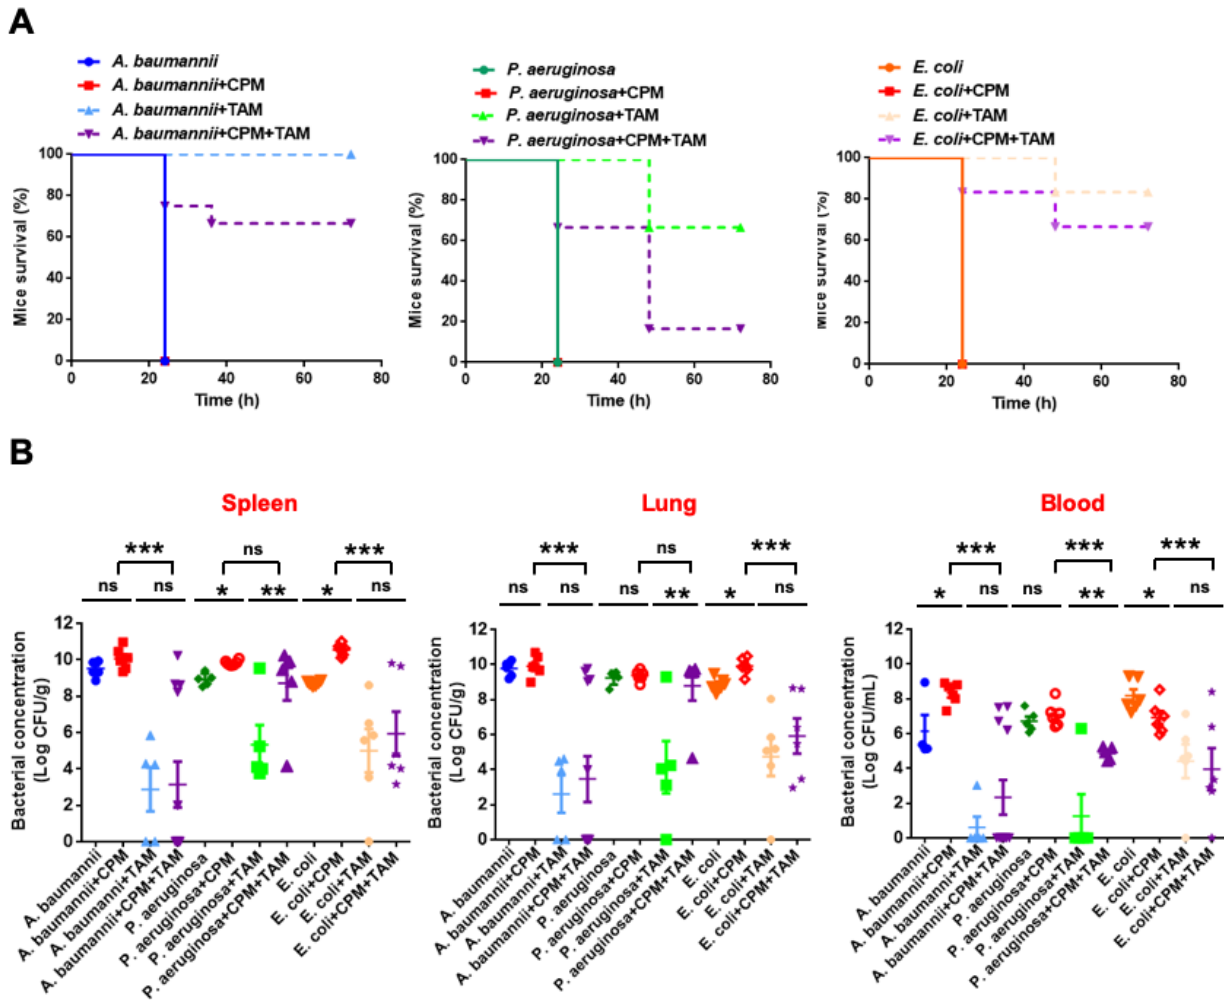

729

730 **Figure 7. Immunosuppressed mice respond to TAM treatment.** (A) Mice survival was  
 731 monitored during 3 days for immunocompetent and neutropenic mice, induced by  
 732 cyclophosphamide, infected with MLD100 of *A. baumannii* ATCC17978, *P. aeruginosa* PAO1  
 733 or *E. coli* ATCC25922 strains treated or not with 3 ip. doses of tamoxifen (80 mg/kg/d, for 3  
 734 days). (B) Bacterial burden in tissues and blood of immunocompetent and neutropenic mice  
 735 treated or not with 3 i.p. doses of tamoxifen (80 mg/kg/d, for 3 days), and infected with MLD100  
 736 of *A. baumannii* ATCC17978, *P. aeruginosa* PAO1 or *E. coli* ATCC25922 strains. \*P<0.05:

737 bacteria vs. bacteria + CPM, \*\* $P < 0.05$ : bacteria + TAM vs. bacteria + CPM + TAM, \*\*\* $P < 0.05$ :

738 bacteria + CPM vs. bacteria + CPM + TAM. CPM: cyclophosphamide, TAM: tamoxifen. ns:

739 non-significant.

740

741

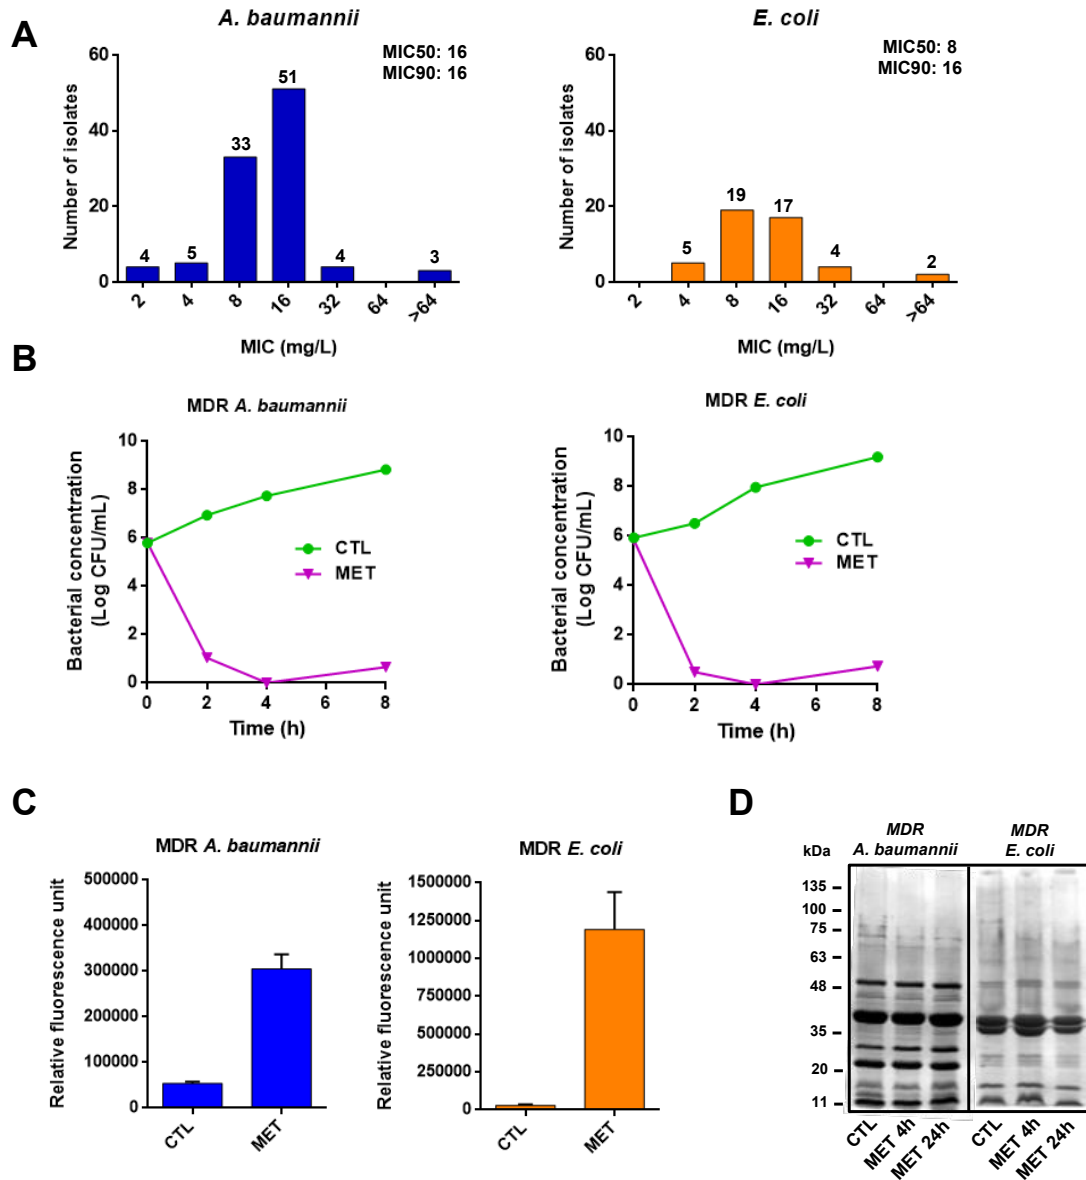

742

743 **Figure 8. Tamoxifen metabolites present antibacterial activity targeting the bacterial**

744 **membrane.** (A) Histogram distribution of MIC for the three tamoxifen metabolites mixture

745 against a collection of *A. baumannii* and *E. coli*. (B) Time–kill curves of the MDR *A. baumannii*

746 Ab186 and *E. coli* EcMCR<sup>+</sup> strains alone and in the presence of metabolites mixture (4xMIC)

747 for 8 h. (C) Tamoxifen metabolites effect on the bacterial permeability. The membrane

748 permeabilization of MDR *A. baumannii* Ab186 and *E. coli* EcMCR<sup>+</sup> strains in absence and

749 presence of tamoxifen metabolites (2 and 16 mg/L, respectively) incubated for 24 h, was  
750 quantified by Typhon Scanner. **(D)** SDS–PAGE of the outer membrane proteins of MDR A.  
751 *baumannii* Ab186 and *E. coli* EcMCR<sup>+</sup> strains with or without tamoxifen metabolites (2 and 16  
752 mg/L, respectively). MET: The three tamoxifen metabolites together. CTL: control.

753
